# Supplementary material for: Innate and secondary humoral responses are improved by increasing the time between MVA vaccine immunizations
Source: PubMed Central journal article supplement (PMC7081268; doi:10.1038/s41541-020-0175-8), 2020-03-19
Supplement: 41541_2020_175_MOESM2_ESM.pdf [file 41541_2020_175_MOESM2_ESM.pdf]

**Innate and secondary humoral responses are improved by increasing the time between MVA vaccine immunizations**

Jean-Louis Palgen<sup>1,2</sup>, Nicolas Tchitchek<sup>1,2</sup>, André Rodriguez-Pozo<sup>1,2</sup>, Quentin Jouhault<sup>1,2</sup>, Hadjer Abdelhouahab<sup>1,2</sup>, Nathalie Dereuddre-Bosquet<sup>1,2</sup>, Vanessa Cont'reras<sup>1,2</sup>, Frédéric Martinon<sup>1,2</sup>, Antonio Cosma<sup>1,2</sup>, Yves Lévy<sup>2,3</sup>, Roger Le Grand<sup>1,2</sup>, and Anne-Sophie Beignon<sup>1,2\*</sup>

<sup>1</sup> CEA – Université Paris Sud 11 – INSERM U1184, Immunology of Viral Infections and Autoimmune Diseases, IDMIT department, IBFJ, 92265 Fontenay-aux-Roses, France

<sup>2</sup> Vaccine Research Institute, Henri Mondor Hospital, 94010 Créteil, France

<sup>3</sup> Institut Mondor de Recherche Biomédicale – INSERM U955, Eq.16, 94010, Créteil, France

\*Corresponding author and lead contact: Anne-Sophie Beignon; 18, route du Panorama, 92265 Fontenay-aux-Roses, France; Phone: +33 1 46 54 80 27, Fax: +33 1 46 54 77 26; email: [anne-sophie.beignon@cea.fr](mailto:anne-sophie.beignon@cea.fr)

**Supplementary material**

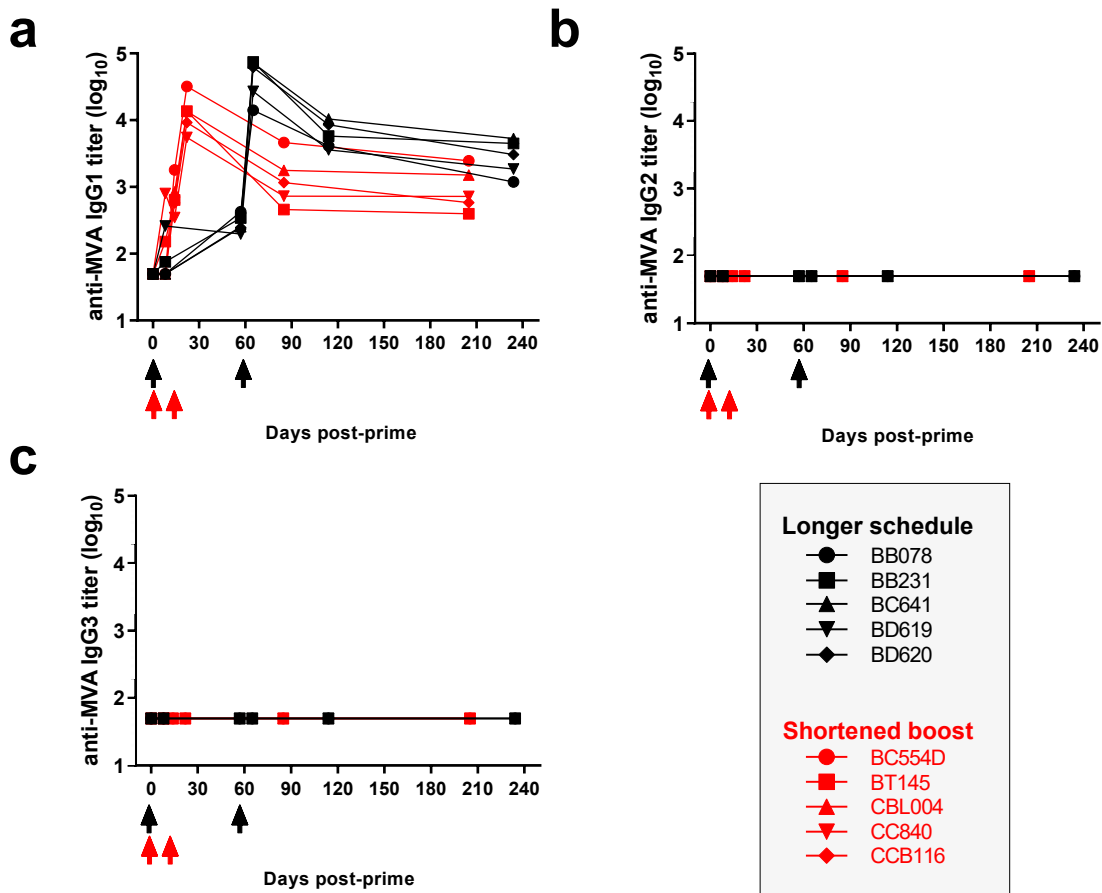

**Supplementary Figure 1 – MVA-specific IgG subclasses in serum over time.** MVA-specific (a) IgG1, (b) IgG2, and (c) IgG3 titers were measured by direct ELISA during the prime/early boost (red) or prime/classical boost (black) vaccination schedule. Individual titers are shown. Immunizations are indicated by arrows.

**a**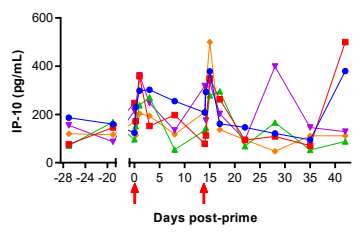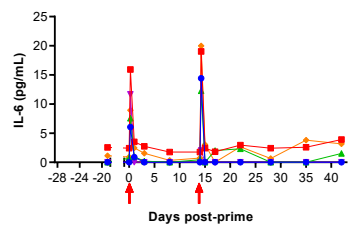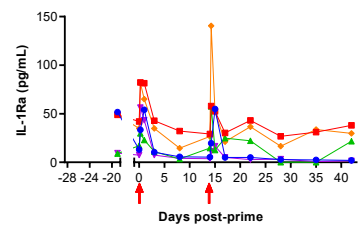**b**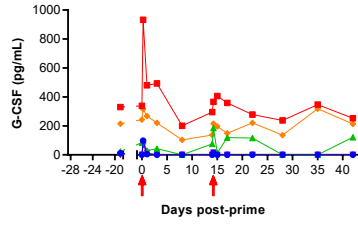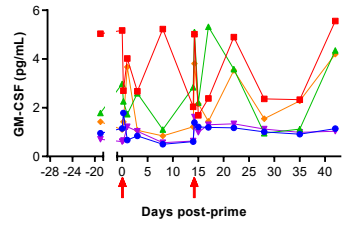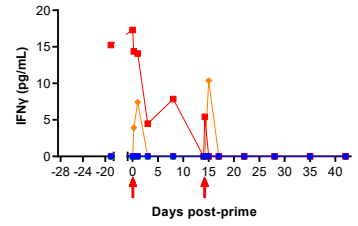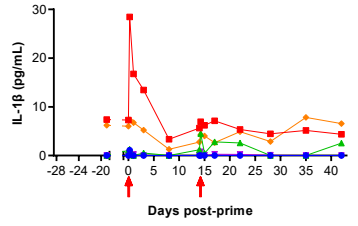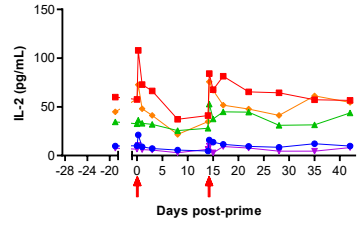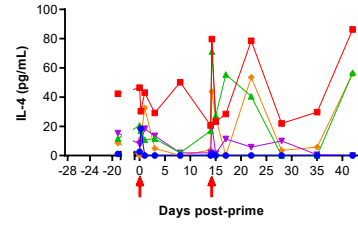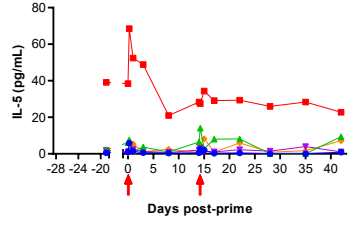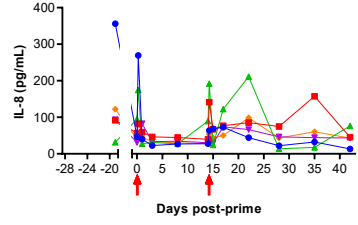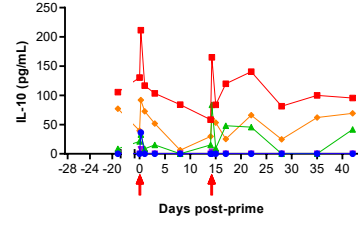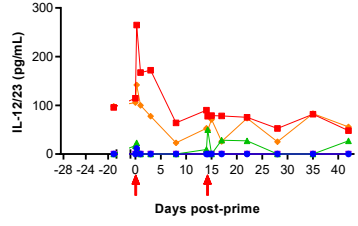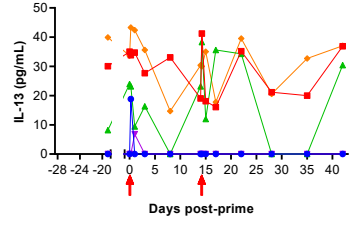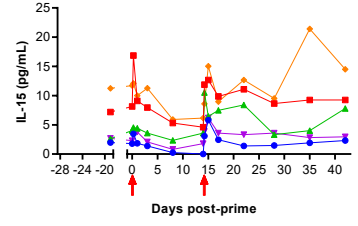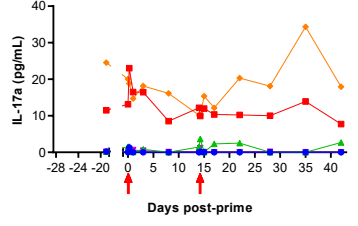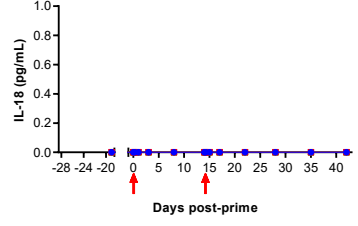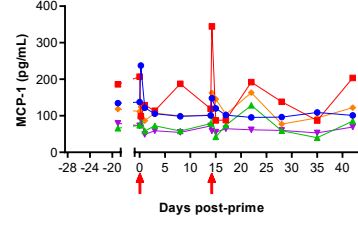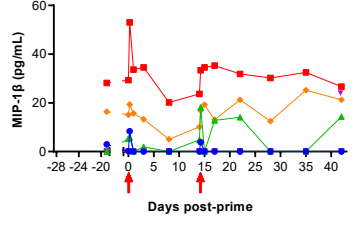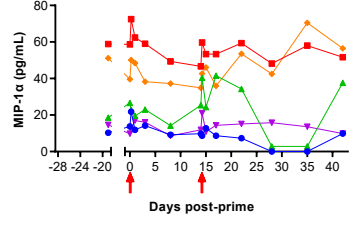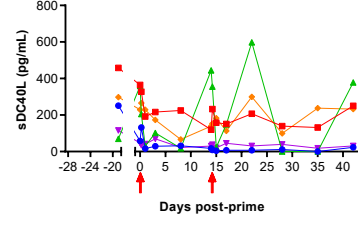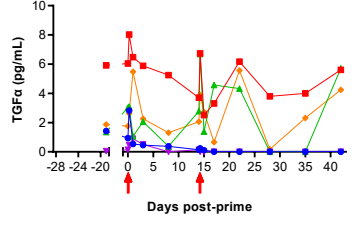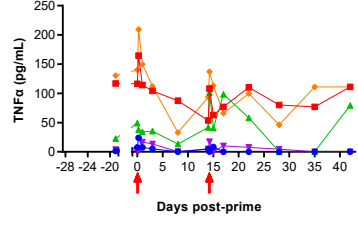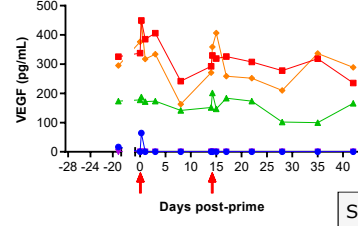**c**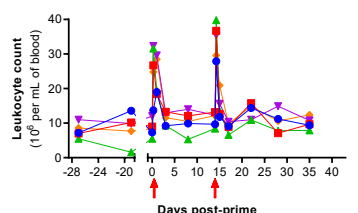**d**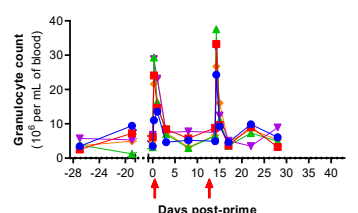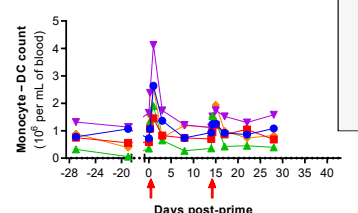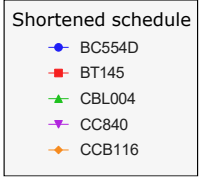

**Supplementary Figure 2 – Plasma cytokine concentrations and blood leukocyte counts following prime/early boost.** (a) Cytokines significantly impacted by vaccination. (b) Cytokines not significantly impacted by vaccination. (c) Leukocyte counts after vaccination. (d) Granulocyte and Monocyte-DC counts after vaccination. (a-d) The individual curves are displayed. Immunizations are indicated by red arrows.

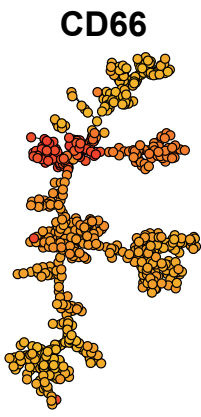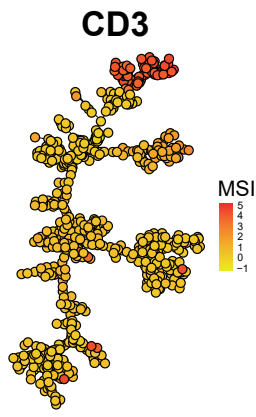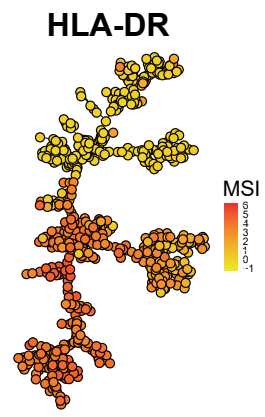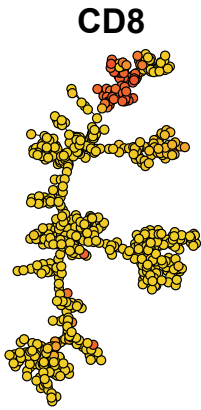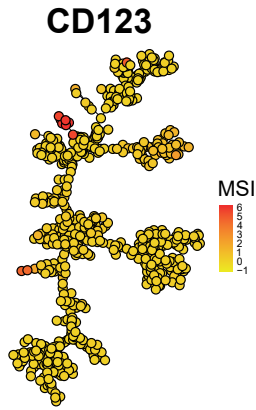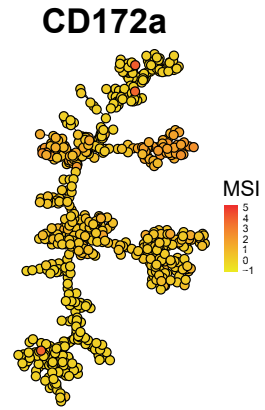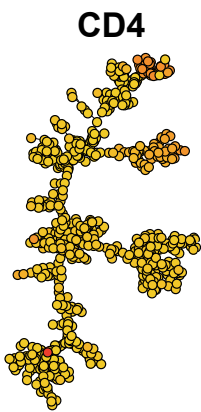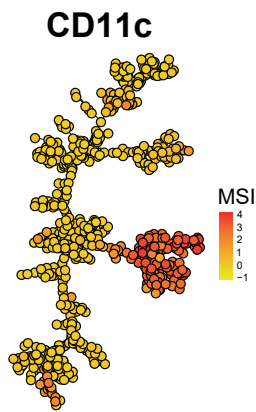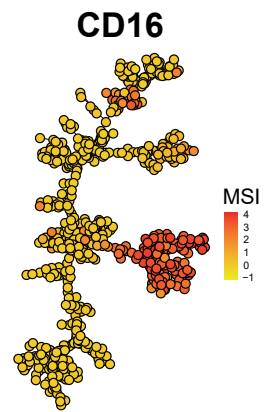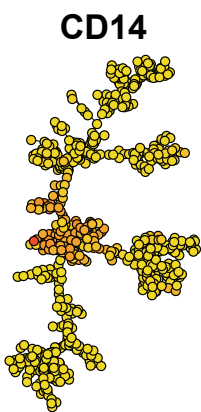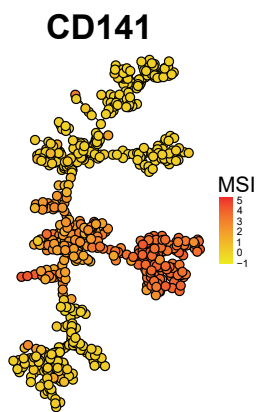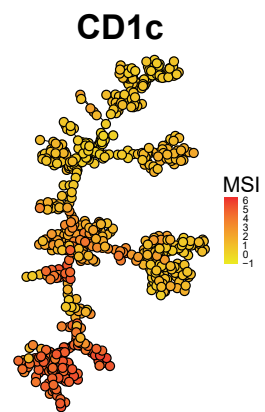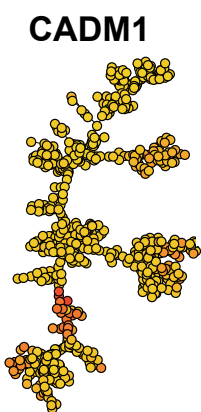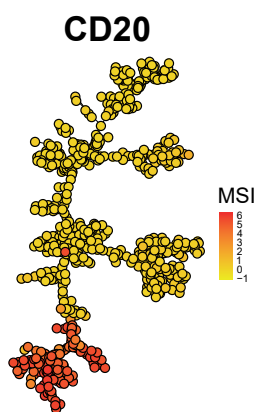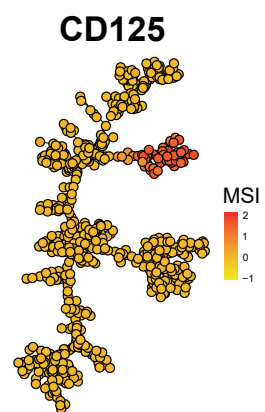

**Supplementary Figure 3 – SPADE tree annotation.** The topology of the SPADE tree is displayed, with each node colored by the expression of the 15 markers used to annotate cell clusters.

Similar response to prime and boost

Distinct response to prime and boost

Heterogeneous or no response

Kinetic family I

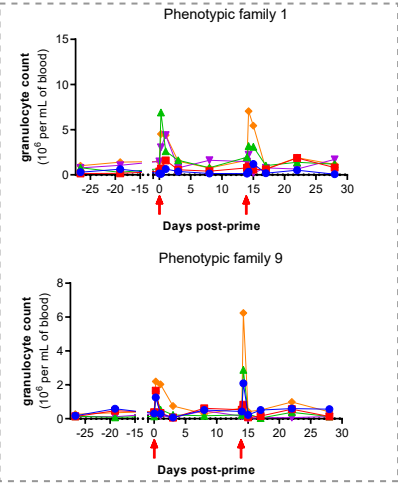

Kinetic family II

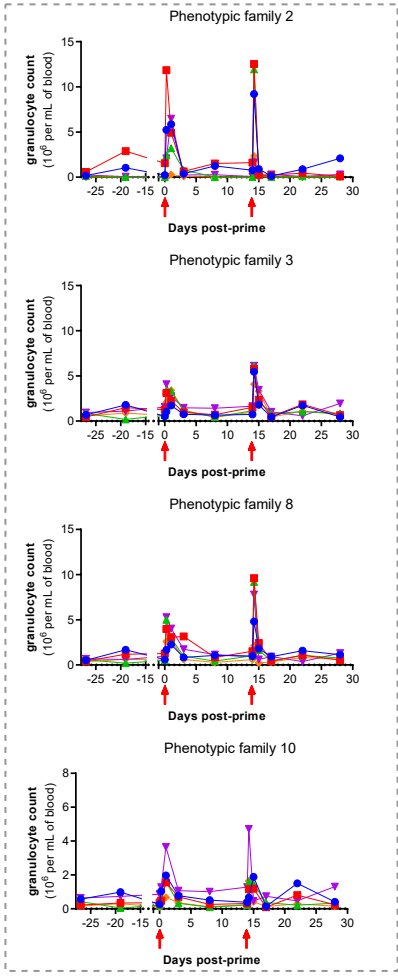

Kinetic family V

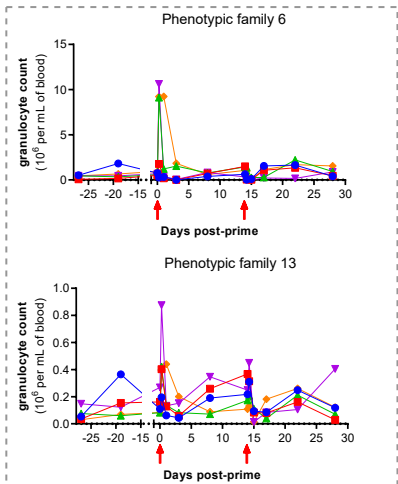

Kinetic family IV

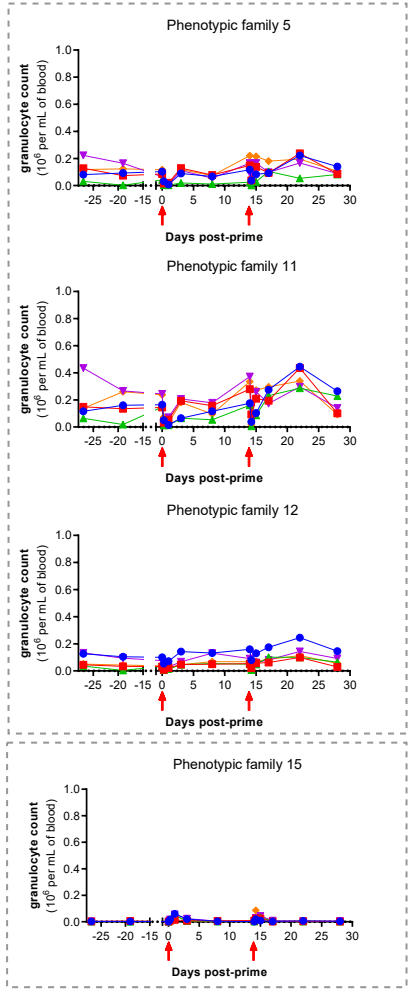

Kinetic family VII

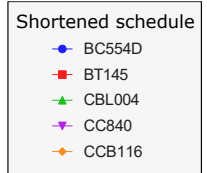

Kinetic family VI

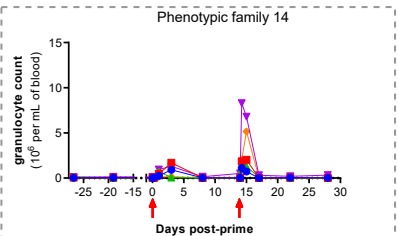

Kinetic family VIII

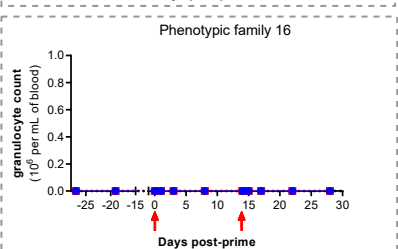

Kinetic family III

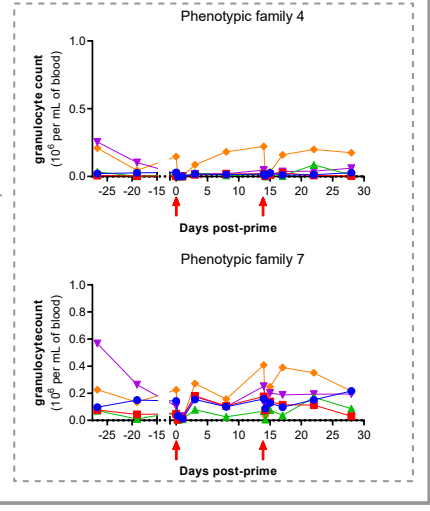

**Supplementary Figure 4 – Abundance of granulocyte phenotypic families.** The absolute count of each of the 16 granulocytes phenotypic families are displayed. Dotted grey frames regroup phenotypic families into their associated kinetic families and bold grey frames regroup kinetic families into superkinetic families. Kinetic families are ordered with respect to **Figure 5**.



Similar response to prime and boost

Distinct response to prime and boost

Heterogeneous or no response

Kinetic family II

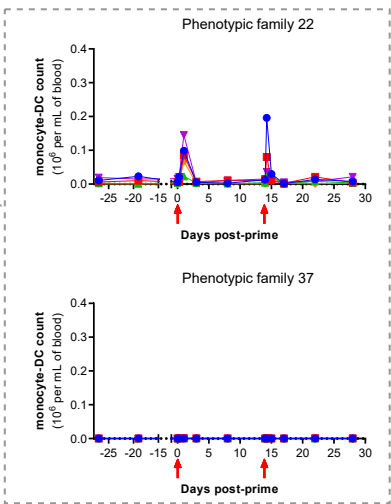

Kinetic family V

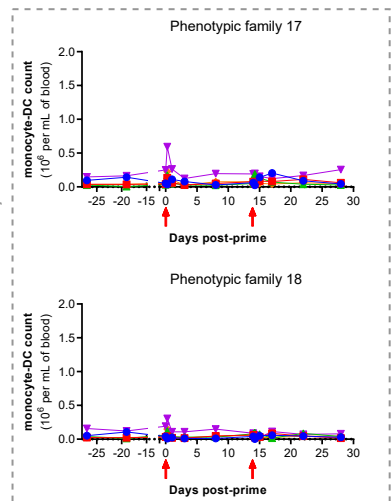

Kinetic family VI

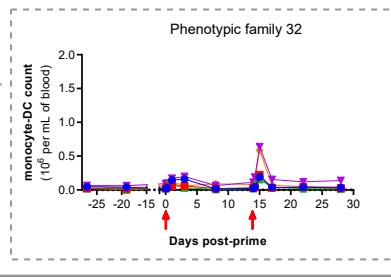

Kinetic family VII

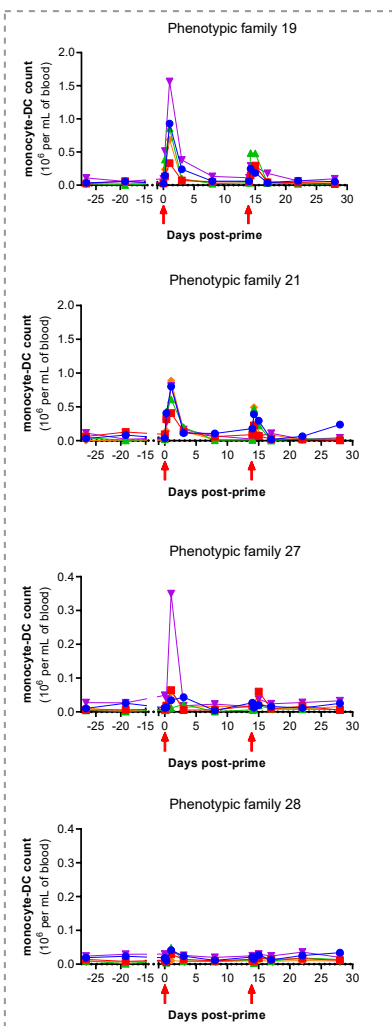

Kinetic family X

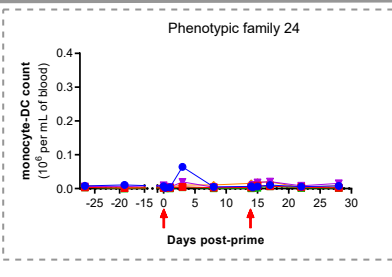

Kinetic family XIII

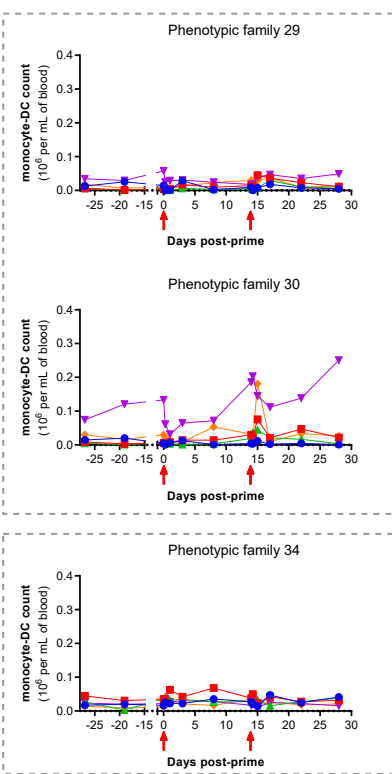

Kinetic family III

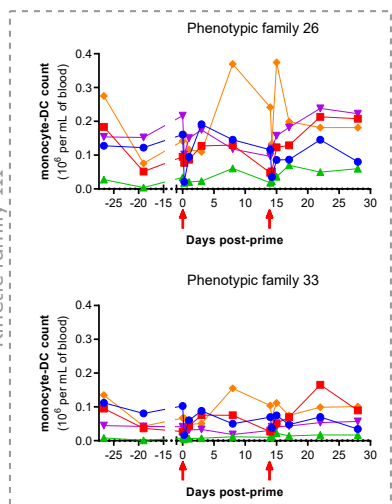

Kinetic family IX

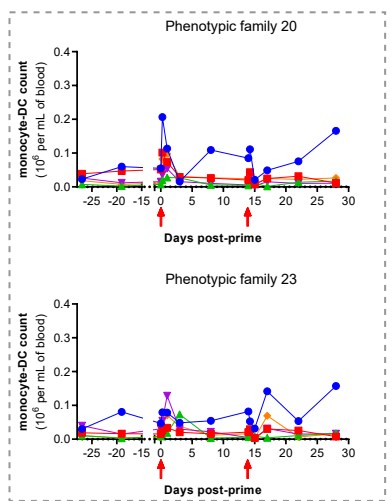

Kinetic family XI

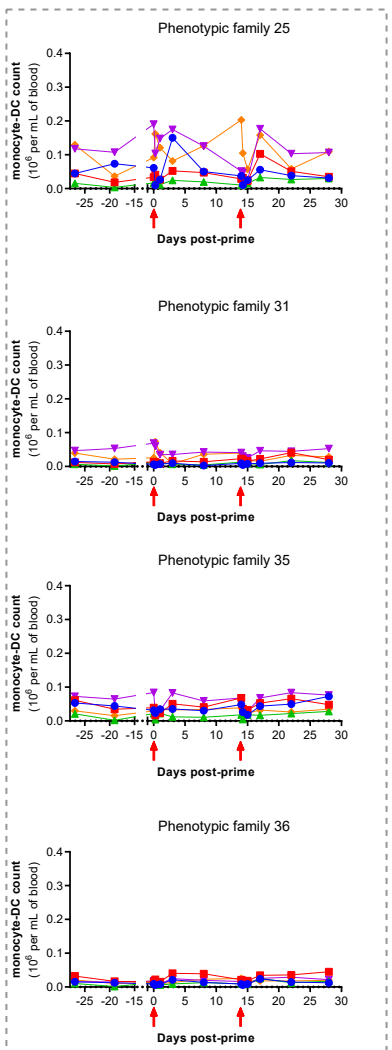

- Shortened schedule
- BC554D
  - BT145
  - CBL004
  - CC840
  - CCB116

**Supplementary Figure 5 – Abundance of monocytes-DCs phenotypic families.** The absolute counts of each of the 21 monocytes-DCs phenotypic families are displayed. Dotted grey frames regroup phenotypic families into their associated kinetic families and bold grey frames regroup kinetic families into superkinetic families. Kinetic families are ordered with respect to **Figure 5**.



**Supplementary Figure 6 – Phenotypic composition after prime/early boost.** The composition in **(a)** granulocytes, and **(b)** monocytes-DCs phenotypic families along the timecourse of vaccination. Cell abundance is given by the size of the pie chart. The color-code and annotation for each phenotypic family is conserved between pie-slices, heatmaps (**Figure 4**), and circos (**Figure 5**).

**a**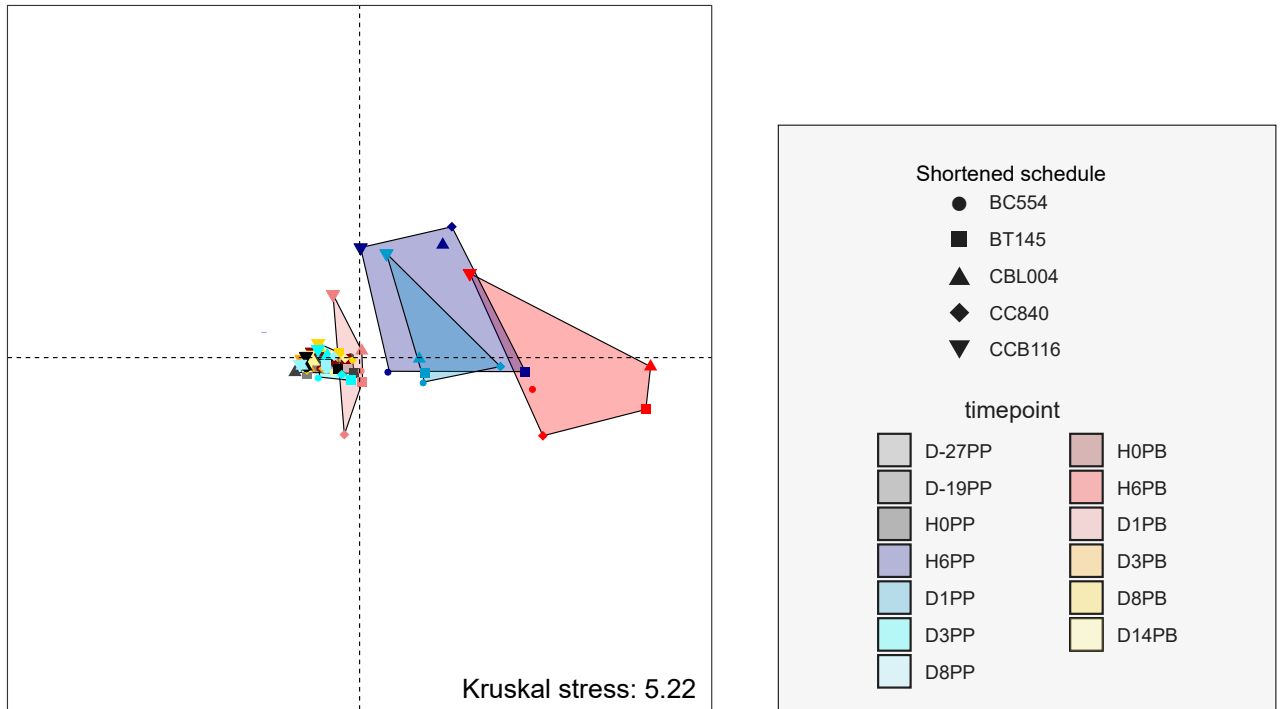**b**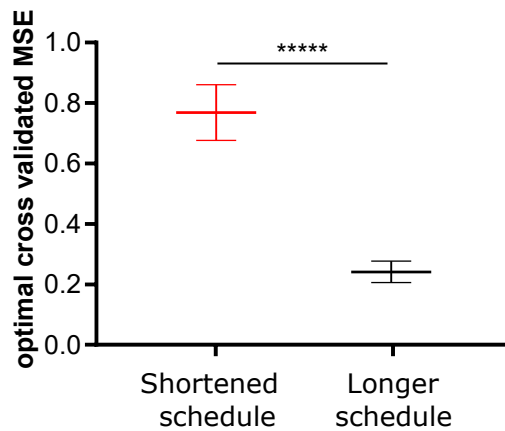

**Supplementary Figure 7 – Comparison of the innate myeloid cell response to prime and to early boost. (a)** Multidimensional Scaling (MDS) representation was calculated based on the cell abundances of the kinetic families. The proportion of information lost during the dimensionality reduction process is indicated with the Kruskal Stress. Samples collecting at the same timepoint were delineated using convex hulls, and color-coded. **(b)** The Least Absolute Shrinkage and Selection Operator (LASSO) approach was applied to discriminate samples from post-prime and post-early boost responses, and the mean square error (MSE) of the optimal LDA obtained on the prime/early boost dataset was compared that of the prime/classical boost dataset. \*\*\*\*\*, p-value <0.00001 using a t-test.

**a**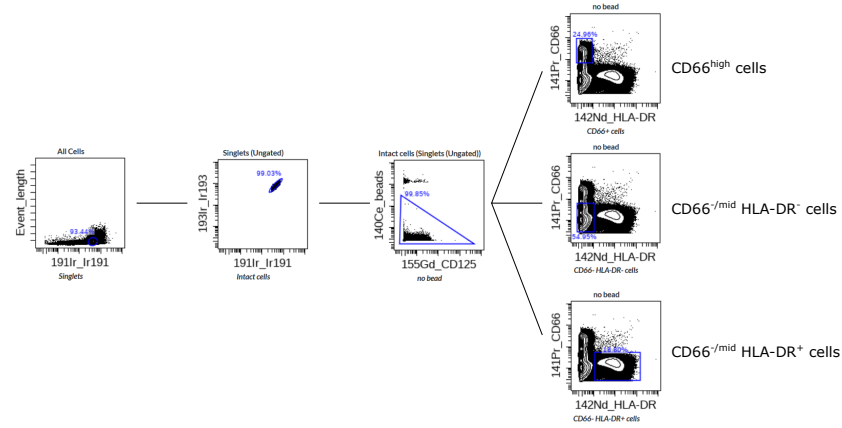**b**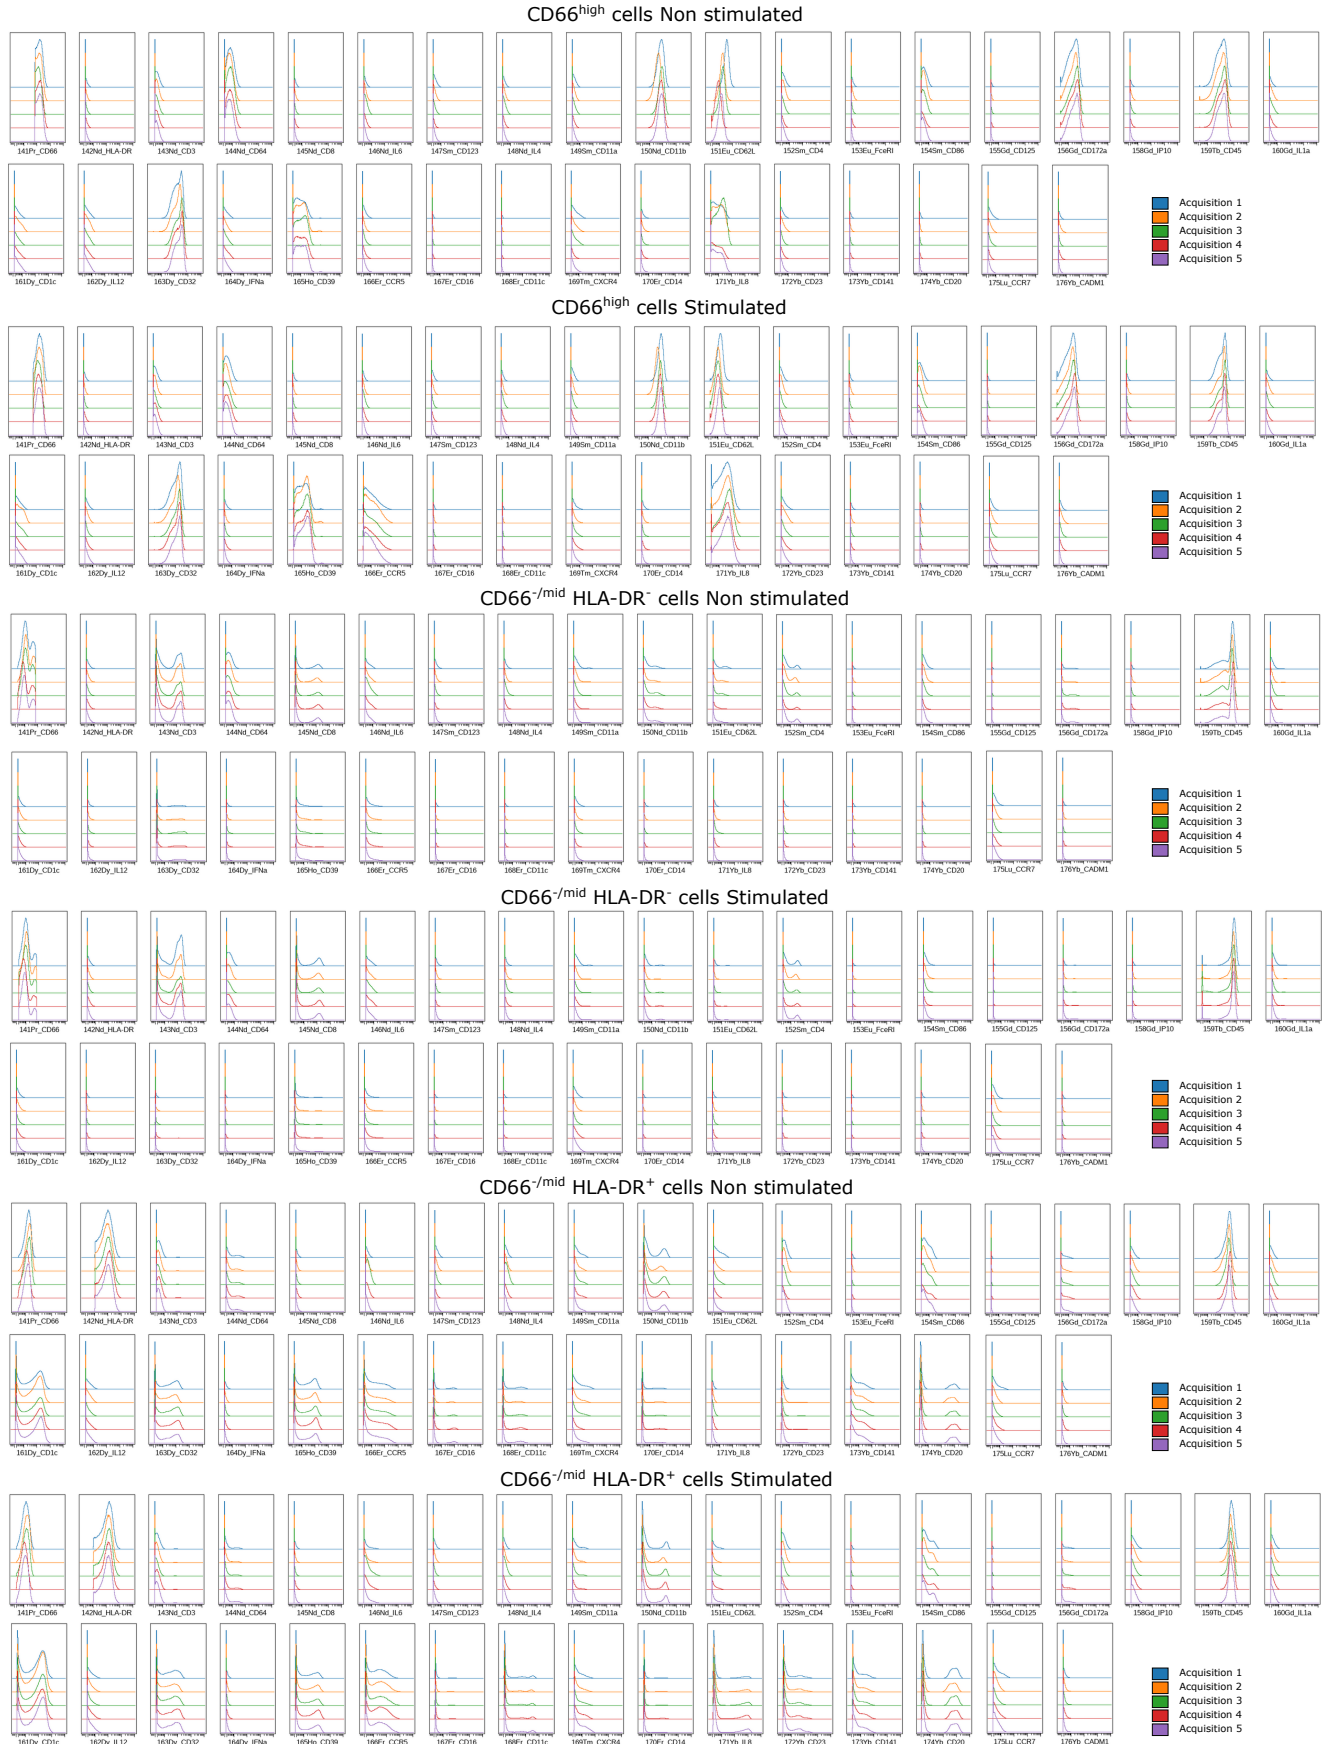

**Supplementary Figure 8 – Staining and acquisition controls.** The same control samples were stained and acquired for each of the five stainings-acquisitions of the samples from the vaccinated animals. These controls were obtained after *ex vivo* restimulation of whole blood from one unrelated macaque with or without a TLR ligand cocktail (TLR 3, 4,7,and 8) composed of 1 µg/mL LPS (from *E. coli*0111:B4, Invivogen), 100 µg/mL Poly I-C (Invivogen),and 10 µg/mL R848 (Mabtech). Whole blood was incubated with or without stimulation for 6h, with the addition of 10 µg/mL BFA (Sigma) during the last 4h. Cells were then fixed, red-blood cells lysed, and frozen as for vaccinated animal samples. The staining and acquisition of the control samples were performed in parallel of those of the vaccinated animals samples in the following order: acquisition 1 corresponding to BC554D, 2 to BT145, 3 to CBL004, 4 to CC840 and 5 to CCB116. **(a)** Gating strategy to define the cell populations to compare staining profiles between control samples. The non stimulated control sample for the acquisition of macaque BC554D samples is shown. **(b)** Distribution of all markers across CD66<sup>high</sup>, CD66<sup>-/mid</sup> HLA-DR<sup>-</sup>,and CD66<sup>-/mid</sup> HLA-DR<sup>+</sup> cells.

|                     |                   | IgG    | IgA    | nAb    | FcyRIIIa dimer binding |
|---------------------|-------------------|--------|--------|--------|------------------------|
| prime/early boost   | baseline vs D8PP  | 1,0000 | 0,4444 | 1,0000 | \                      |
|                     | baseline vs D14PP | 0,0079 | 0,1667 | 1,0000 | 0,2063                 |
|                     | baseline vs D8PB  | 0,0079 | 0,0079 | 0,0476 | \                      |
|                     | baseline vs D14PB | 0,0079 | 0,1667 | 0,0476 | 0,0079                 |
|                     | baseline vs D28PB | 0,0079 | 0,0079 | 0,0476 | \                      |
|                     | baseline vs D57PB | 0,0079 | 0,0079 | 0,0476 | 0,0238                 |
|                     | baseline vs M3PB  | 0,0079 | 0,0476 | 0,1667 | \                      |
|                     | baseline vs M6PB  | 0,0079 | 0,0476 | 0,1667 | 0,0238                 |
|                     | D8PP vs D14PP     | 0,0079 | 0,3651 | 1,0000 | \                      |
|                     | D8PP vs D8PB      | 0,0079 | 0,0238 | 0,0476 | \                      |
|                     | D8PP vs D14PB     | 0,0079 | 0,2063 | 0,0476 | \                      |
|                     | D8PP vs D28PB     | 0,0079 | 0,0714 | 0,0476 | \                      |
|                     | D8PP vs D57PB     | 0,0079 | 0,2937 | 0,0476 | \                      |
|                     | D8PP vs M3PB      | 0,0079 | 0,1032 | 0,1667 | \                      |
|                     | D8PP vs M6PB      | 0,0079 | 0,1270 | 0,1667 | \                      |
|                     | D14PP vs D8PB     | 0,0079 | 0,1111 | 0,0476 | \                      |
|                     | D14PP vs D14PB    | 0,0079 | 0,4048 | 0,0476 | 0,0079                 |
|                     | D14PP vs D28PB    | 0,0159 | 0,5317 | 0,0476 | \                      |
|                     | D14PP vs D57PB    | 0,1349 | 0,9762 | 0,0476 | 0,1111                 |
|                     | D14PP vs M3PB     | 0,4603 | 0,9444 | 0,1667 | \                      |
|                     | D14PP vs M6PB     | 0,5714 | 1,0000 | 0,1667 | \                      |
|                     | D8PB vs D14PB     | 0,4921 | 0,5238 | 0,7063 | \                      |
|                     | D8PB vs D28PB     | 0,0476 | 0,2619 | 1,0000 | \                      |
|                     | D8PB vs D57PB     | 0,0079 | 0,0714 | 0,3651 | \                      |
|                     | D8PB vs M3PB      | 0,0079 | 0,1667 | 0,1270 | \                      |
|                     | D8PB vs M6PB      | 0,0079 | 0,1349 | 0,1032 | 0,1667                 |
|                     | D14PB vs D28PB    | 0,0794 | 0,7937 | 0,8571 | \                      |
|                     | D14PBvs D57PB     | 0,0079 | 0,2937 | 0,4683 | 0,0079                 |
|                     | D14PB vs M3PB     | 0,0079 | 0,4444 | 0,1270 | \                      |
|                     | D14PB vs M6PB     | 0,0079 | 0,4524 | 0,1032 | 0,0079                 |
|                     | D28PB vs D57PB    | 0,0079 | 0,3810 | 0,5556 | \                      |
|                     | D28PB vs M3PB     | 0,0079 | 0,4286 | 0,3810 | \                      |
|                     | D28PB vs M6PB     | 0,0079 | 0,3333 | 0,3333 | \                      |
| D57PB vs M3PB       | 0,1349            | 0,7460 | 0,5397 | \      |                        |
| D57PB vs M6PB       | 0,1032            | 1,0000 | 0,5714 | 0,5556 |                        |
| M3PB vs M6PB        | 0,6190            | 0,8016 | 0,8571 | \      |                        |
| prime/delayed boost | baseline vs D8PP  | 0,4444 | 0,0476 | 1,0000 | \                      |
|                     | baseline vs D14PP | 0,0079 | 0,0476 | 1,0000 | 0,0952                 |
|                     | baseline vs D8PB  | 0,0079 | 0,0476 | 0,0079 | \                      |
|                     | baseline vs D14PB | 0,0079 | 0,0476 | 0,0079 | 0,0079                 |
|                     | baseline vs D28PB | 0,0476 | 0,0079 | 0,0079 | \                      |
|                     | baseline vs D57PB | 0,0079 | 0,0079 | 0,0079 | 0,0079                 |
|                     | baseline vs M3PB  | 0,0079 | 0,0079 | 0,0079 | \                      |
|                     | baseline vs M6PB  | 0,0079 | 0,0079 | 0,0079 | 0,0397                 |
|                     | D8PP vs D14PP     | 0,0079 | 0,0556 | 1,0000 | \                      |
|                     | D8PP vs D8PB      | 0,0079 | 0,0476 | 0,0079 | \                      |
|                     | D8PP vs D14PB     | 0,0079 | 0,0476 | 0,0079 | \                      |
|                     | D8PP vs D28PB     | 0,0476 | 0,0079 | 0,0079 | \                      |
|                     | D8PP vs D57PB     | 0,0079 | 0,0079 | 0,0079 | \                      |
|                     | D8PP vs M3PB      | 0,0079 | 0,0079 | 0,0079 | \                      |
|                     | D8PP vs M6PB      | 0,0079 | 0,0079 | 0,0079 | \                      |
|                     | D14PP vs D8PB     | 0,0079 | 0,0476 | 0,0079 | \                      |
|                     | D14PP vs D14PB    | 0,0079 | 0,0476 | 0,0079 | 0,0079                 |
|                     | D14PP vs D28PB    | 0,1429 | 0,0079 | 0,0079 | \                      |
|                     | D14PP vs D57PB    | 0,0159 | 0,0714 | 0,0079 | 0,0079                 |
|                     | D14PP vs M3PB     | 0,0159 | 0,1032 | 0,0079 | \                      |
|                     | D14PP vs M6PB     | 0,0397 | 0,0079 | 0,0079 | \                      |
|                     | D8PB vs D14PB     | 0,7460 | 1,0000 | 0,7619 | \                      |
|                     | D8PB vs D28PB     | 0,0238 | 0,4048 | 0,2222 | \                      |
|                     | D8PB vs D57PB     | 0,0079 | 0,1111 | 0,0079 | \                      |
|                     | D8PB vs M3PB      | 0,0079 | 0,1032 | 0,0079 | \                      |
|                     | D8PB vs M6PB      | 0,0079 | 0,4921 | 0,0079 | 0,0159                 |
|                     | D14PB vs D28PB    | 0,0238 | 0,4127 | 0,2302 | \                      |
|                     | D14PBvs D57PB     | 0,0079 | 0,0873 | 0,0079 | 0,0079                 |
|                     | D14PB vs M3PB     | 0,0079 | 0,0873 | 0,0079 | \                      |
|                     | D14PB vs M6PB     | 0,0079 | 0,5873 | 0,0079 | 0,0079                 |
|                     | D28PB vs D57PB    | 0,9206 | 0,1587 | 0,0079 | \                      |
|                     | D28PB vs M3PB     | 0,6587 | 0,2222 | 0,0079 | \                      |
|                     | D28PB vs M6PB     | 0,3968 | 0,1190 | 0,0079 | \                      |
| D57PB vs M3PB       | 0,5079            | 0,6349 | 0,6032 | \      |                        |
| D57PB vs M6PB       | 0,2460            | 0,0317 | 0,9841 | 0,0159 |                        |
| M3PB vs M6PB        | 0,4921            | 0,0238 | 0,6587 | \      |                        |

Supplementary Table 1 – Statistics for antibody titers. P-values of the permutation tests are given for the indicated comparisons. Red indicate significant differences, p <0.05.



| Cytokine       | H6PP vs HOPP | D1PP vs HOPP | D3PP vs HOPP | D8PP vs HOPP | HOPB vs HOPP | H6PB vs HOPP | D1PB vs HOPP | D3PB vs HOPP | D8PB vs HOPP | D14PB vs HOPP | D28PB vs HOPP | H6PP vs H6PB | D1PP vs D1PB | D3PP vs D3PB | D8PP vs D8PB | D14PP vs D14PB |
|----------------|--------------|--------------|--------------|--------------|--------------|--------------|--------------|--------------|--------------|---------------|---------------|--------------|--------------|--------------|--------------|----------------|
| IP-10          | 0,8810       | 0,0476       | 0,1508       | 0,7302       | 0,9365       | 0,4286       | 0,0079       | 0,4603       | 0,0556       | 1,0000        | 0,0714        | 0,9365       | 0,6190       | 0,1508       | 0,7381       | 0,2937         |
| G-CSF          | 0,5952       | 0,8889       | 1,0000       | 0,4841       | 0,8413       | 0,9206       | 1,0000       | 1,0000       | 1,0000       | 0,6032        | 0,9524        | 0,8413       | 0,6349       | 0,7619       | 0,8413       | 0,4444         |
| GM-CSF         | 0,8730       | 1,0000       | 0,8016       | 0,7937       | 0,5635       | 0,3095       | 0,7222       | 1,0000       | 0,5476       | 0,6429        | 0,4127        | 0,5635       | 0,1667       | 0,4524       | 0,6905       | 0,3730         |
| IFN $\gamma$   | 1,0000       | 1,0000       | 1,0000       | 1,0000       | 1,0000       | 1,0000       | 1,0000       | 1,0000       | 1,0000       | 1,0000        | 1,0000        | 1,0000       | 0,7222       | 0,7222       | 1,0000       | 1,0000         |
| IL10           | 0,5159       | 1,0000       | 0,9206       | 0,5635       | 0,6429       | 0,5714       | 0,8095       | 1,0000       | 0,7778       | 0,6429        | 1,0000        | 0,6429       | 0,8333       | 0,8413       | 0,9048       | 0,4048         |
| IL-12/23       | 0,5952       | 1,0000       | 1,0000       | 0,3651       | 0,6349       | 0,7143       | 0,6032       | 0,5238       | 0,6825       | 0,3651        | 0,4921        | 0,6349       | 0,5159       | 0,5635       | 0,7222       | 0,3651         |
| IL-13          | 0,7619       | 1,0000       | 0,8571       | 0,3651       | 0,6667       | 0,7143       | 0,6190       | 0,7143       | 0,8095       | 0,2857        | 0,7619        | 0,6667       | 1,0000       | 0,6667       | 1,0000       | 0,2857         |
| IL-15          | 0,4762       | 1,0000       | 0,9206       | 0,3095       | 0,3889       | 0,4286       | 0,2857       | 0,7540       | 0,5556       | 0,9048        | 0,6032        | 0,3889       | 0,9206       | 0,2540       | 0,7381       | 0,1349         |
| IL-17a         | 0,7619       | 0,8413       | 1,0000       | 0,7619       | 0,6825       | 0,7619       | 0,7619       | 0,6825       | 1,0000       | 0,7619        | 0,8413        | 0,6825       | 0,4365       | 0,8413       | 0,6825       | 0,7619         |
| IL-18          | 1,0000       | 1,0000       | 1,0000       | 1,0000       | 1,0000       | 1,0000       | 1,0000       | 1,0000       | 1,0000       | 1,0000        | 1,0000        | 1,0000       | 1,0000       | 1,0000       | 1,0000       | 1,0000         |
| IL-1 $\beta$   | 0,7222       | 0,8810       | 0,9206       | 0,3651       | 0,8095       | 0,8730       | 0,8413       | 1,0000       | 0,5238       | 1,0000        | 1,0000        | 0,8095       | 0,7222       | 0,7222       | 0,8016       | 0,2857         |
| IL-1Ra         | 0,0635       | 0,0476       | 0,8016       | 0,2063       | 0,5476       | 0,2381       | 0,2460       | 0,5476       | 0,9444       | 0,1905        | 0,7381        | 0,5476       | 0,8651       | 0,4286       | 0,6746       | 0,3254         |
| IL-2           | 0,5476       | 1,0000       | 0,9524       | 0,2857       | 0,5635       | 0,5635       | 0,8413       | 0,7381       | 1,0000       | 0,9365        | 1,0000        | 0,5635       | 1,0000       | 0,8333       | 0,6825       | 0,2460         |
| IL-4           | 0,8492       | 0,7698       | 0,7937       | 0,6032       | 0,5714       | 0,1984       | 1,0000       | 0,7937       | 0,3095       | 0,5397        | 0,2778        | 0,5714       | 0,2222       | 0,5397       | 0,6667       | 0,2063         |
| IL-5           | 0,7222       | 0,8810       | 0,8810       | 0,7222       | 0,8810       | 0,7619       | 1,0000       | 1,0000       | 1,0000       | 0,7222        | 1,0000        | 0,8810       | 0,8016       | 0,8810       | 0,8810       | 0,5159         |
| IL-6           | 0,0079       | 0,3810       | 0,9206       | 0,5635       | 0,7143       | 0,0159       | 0,9206       | 1,0000       | 0,4286       | 0,8413        | 0,3968        | 0,7143       | 0,3968       | 0,6190       | 0,9206       | 0,1667         |
| IL-8           | 0,2698       | 0,9206       | 0,1111       | 0,0794       | 0,4683       | 0,3571       | 0,7143       | 0,1984       | 0,1984       | 0,4841        | 0,7540        | 0,4683       | 0,7540       | 0,7143       | 0,0079       | 0,0159         |
| MCP-1          | 0,7222       | 0,3095       | 0,3889       | 0,6429       | 0,4206       | 0,6270       | 0,4365       | 0,3254       | 0,8730       | 0,2857        | 1,0000        | 0,4206       | 0,5397       | 1,0000       | 0,6825       | 0,4048         |
| MIP-1 $\alpha$ | 0,8571       | 1,0000       | 1,0000       | 0,6905       | 0,7778       | 0,7937       | 1,0000       | 1,0000       | 0,8810       | 0,5317        | 0,8333        | 0,7778       | 1,0000       | 0,9286       | 1,0000       | 0,4921         |
| MIP-1 $\beta$  | 0,6190       | 1,0000       | 1,0000       | 0,6429       | 0,8254       | 0,7540       | 1,0000       | 0,7619       | 0,7937       | 0,8413        | 0,8730        | 0,8254       | 0,7937       | 1,0000       | 1,0000       | 0,3254         |
| sCD40L         | 0,8730       | 0,2222       | 0,2540       | 0,0952       | 0,5635       | 0,6190       | 0,1508       | 0,2302       | 1,0000       | 0,1111        | 0,7381        | 0,5635       | 0,6825       | 0,6190       | 0,6508       | 0,3254         |
| TGF $\alpha$   | 0,6429       | 0,8730       | 1,0000       | 0,5794       | 0,6667       | 0,5714       | 0,4762       | 0,6667       | 0,7143       | 0,2460        | 0,7381        | 0,6667       | 1,0000       | 0,3413       | 0,7302       | 0,5000         |
| TNF $\alpha$   | 0,6429       | 1,0000       | 0,8333       | 0,2857       | 0,6667       | 0,9206       | 0,7381       | 0,7857       | 0,9444       | 0,3095        | 1,0000        | 0,6667       | 0,8810       | 0,7302       | 1,0000       | 0,3492         |
| VEGF           | 0,7381       | 0,9048       | 1,0000       | 0,4921       | 0,7619       | 1,0000       | 1,0000       | 0,9048       | 0,8095       | 0,6032        | 0,6825        | 0,7619       | 0,7302       | 1,0000       | 0,9048       | 0,6667         |

Supplementary Table 2 – Statistics for cytokines concentrations. P-values of the permutation tests are given for the indicated comparisons. Red indicate significant differences,  $p < 0.05$ .

| Metal | Marker   | Clone     | Supplier                              | Catalog number | Lot number                  | Internal batch number | Surface | Intra-cellular |
|-------|----------|-----------|---------------------------------------|----------------|-----------------------------|-----------------------|---------|----------------|
| 141Pr | CD66abce | TET2      | Miltenyi                              | 120-014-229    | ND                          | JP042                 | •       |                |
| 142Nd | HLA-DR   | L243      | Ozyme                                 | 307651         | B219500                     | JP054                 | •       |                |
| 143Nd | CD3      | SP34.2    | BD                                    | 551916         | 6102787                     | JP050                 | •       |                |
| 144Nd | CD64     | 10.1      | Miltenyi                              | 120-014-229    | 5170127251                  | JP056                 | •       |                |
| 145Nd | CD8      | RPAT8     | BD                                    | 557084         | 4357612                     | JP043                 | •       |                |
| 146Nd | IL-6     | MQ2.13A5  | BD                                    | 554543         | 4283960                     | JP044                 |         | •              |
| 147Sm | CD123    | 7G3       | BD                                    | 554527         | 6195661                     | JP074                 | •       |                |
| 148Nd | IL-4     | 8D48      | BD                                    | 554515         | 5134637                     | JP046                 |         | •              |
| 149Sm | CD11a    | HI111     | Miltenyi                              | 120-014-229    | 5170127255                  | JP075                 | •       |                |
| 150Nd | CD11b    | ICRF144   | BD                                    | 555386         | 7011599                     | JP062                 | •       |                |
| 151Eu | CD62L    | SK11      | Miltenyi                              | 120-014-229    | 5170130321                  | JP087                 | •       |                |
| 152Sm | CD4      | L200      | BD                                    | 550625         | 6127629                     | JP057                 | •       |                |
| 153Eu | FcεRI    | AER37     | eBioscience (ThermoFisher Scientific) | 14-5899-82     | 4325555                     | JP082                 | •       |                |
| 154Sm | CD86     | IT2.2     | BD                                    | 555663         | 5084687                     | JP045                 | •       |                |
| 155Gd | CD125    | A14       | BD                                    | 624084         | 7095835                     | JP097                 | •       |                |
| 156Gd | CD172a   | REA144    | Miltenyi                              | 120-014-229    | 5170127262                  | JP070                 | •       |                |
| 158Gd | IP-10    | 6D4       | Miltenyi                              | 120-014-229    | 5170127258                  | JP064                 |         | •              |
| 159Tb | CD45     | D058-1283 | BD                                    | 552566         | 6294698                     | JP098                 | •       |                |
| 160Gd | IL-1α    | 364/383   | Miltenyi                              | 120-014-229    | 5170127271                  | JP066                 |         | •              |
| 161Dy | CD1c     | AF5910    | R&D systems (Biotechnique)            | AF5910         | CCXE0216031 and CCXE0216111 | JP052                 | •       |                |
| 162Dy | IL-12    | C8.6      | Miltenyi                              | 120-014-229    | 5170127268                  | JP071                 |         | •              |
| 163Dy | CD32     | FLI8.26   | BD                                    | 555447         | 6077664                     | JP067                 | •       |                |
| 164Dy | IFNα     | LT27/295  | Miltenyi                              | 120-014-229    | 5170127269                  | JP072                 |         | •              |
| 165Ho | CD39     | eBioA1    | Biologend                             | 328002         | B215384                     | JP068                 | •       |                |
| 166Er | CCR5     | 3A9       | BD                                    | 556041         | 6224873                     | JP059                 | •       |                |
| 167Er | CD16     | 3G8       | Miltenyi                              | 120-012-311    | 5170127249                  | JP083                 | •       |                |
| 168Er | CD11c    | 3.9       | Biologend                             | 301639         | B218346                     | JP060                 | •       |                |
| 169Tm | CXCR4    | 12G5      | BD                                    | 555971         | 4055691                     | JP033                 | •       |                |
| 170Er | CD14     | M5E2      | BD                                    | 555396         | 6112614                     | JP079                 | •       |                |
| 171Yb | IL-8     | G265.8    | BD                                    | 554717         | 4261555                     | JP099                 |         | •              |
| 172Yb | CD23     | 9P25      | Beckman                               | IMBULK1        | 16LIQ602                    | JP065                 | •       |                |
| 173Yb | CD141    | 1A4       | Fluidigm                              | 3173002B       | 2351601                     | N/A                   | •       |                |
| 174Yb | CD20     | 2H7       | BD                                    | 556631         | 6357603                     | JP061                 | •       |                |
| 175Lu | CCR7     | G043H7    | Miltenyi                              | 120-014-229    | 5170130220                  | JP085                 | •       |                |
| 176Yb | CADM1    | 3E1       | Clinisciences MBL                     | CM004-3        | 039                         | JP053                 | •       |                |

**Supplementary Table 3 – Antibody panel for mass cytometry.** Antibody target, clone, supplier, catalog and lot numbers, and internal batch number after conjugation, and associated metal are indicated as well as whether the antibody was used intra- or extra-cellularly (ND, not defined).

| Kinetic family | Phenotypic family                                      | Cell population                                                                                                        | Kinetic Pattern                            |
|----------------|--------------------------------------------------------|------------------------------------------------------------------------------------------------------------------------|--------------------------------------------|
| III            | Granulocytes 4 and 7<br>Monocytes-DCs 26 and 33        | Eosinophils<br>Diversely activated cDCs, including cDC1,<br>diversely activated monocytes, and<br>uncharacterized APCs | Heterogeneous or no response               |
| IX             | Monocytes-DC 20 and 23                                 |                                                                                                                        |                                            |
| X              | Monocytes-DC 24                                        |                                                                                                                        |                                            |
| XI             | Monocytes-DC 25, 31, 35 and 36                         |                                                                                                                        |                                            |
| XII            | Monocytes-DC 29 and 30                                 |                                                                                                                        |                                            |
| XIII           | Monocytes-DC 34                                        |                                                                                                                        |                                            |
| I              | Granulocytes 1 and 9                                   | Diversely activated neutrophils including<br>CD14+ neutrophils<br>Diversely activated monocytes                        | Similar response to prime and early boost  |
| II             | Granulocytes 2, 3, 8 and 10<br>Monocytes-DCs 22 and 37 |                                                                                                                        |                                            |
| V              | Granulocytes 6 and 13<br>Monocytes-DC 17 and 18        |                                                                                                                        |                                            |
| VI             | Granulocytes 14<br>Monocytes-DC 32                     |                                                                                                                        |                                            |
| VIII           | Granulocytes 16                                        |                                                                                                                        |                                            |
| IV             | Granulocytes 5, 11 and 12                              | Eosinophils, basophils and CD86+ activated<br>neutrophils                                                              | Distinct response to prime and early boost |
| VII            | Granulocytes 15<br>Monocytes-DCs 19, 21, 27 and 28     | Diversely activated monocytes, non-classical<br>monocytes / inflammatory cDCs, and pDCs                                |                                            |

**Supplementary Table 4 – Correspondence between kinetic and phenotypic families.** For each kinetic family, its composition in terms of phenotypic families are indicated. Moreover, its main cell populations, phenotypes, and kinetic pattern are provided (as classified in **Figure 5**).

| Kinetic Family | H6PP vs HOPP | D1PP vs HOPP | D3PP vs HOPP | D8PP vs HOPP | H0PB vs HOPP | H6PB vs HOPP | D1PB vs HOPP | D3PB vs HOPP | D8PB vs HOPP | D14PB vs HOPP | H6PP vs H6PB | D1PP vs D1PB | D3PP vs D3PB | D8PP vs D8PB | D14PP vs D14PB | AUC PP vs AUC PB |
|----------------|--------------|--------------|--------------|--------------|--------------|--------------|--------------|--------------|--------------|---------------|--------------|--------------|--------------|--------------|----------------|------------------|
| I              | 0,0476       | 0,0952       | 0,9048       | 1,0000       | 0,2698       | 0,0238       | 0,3889       | 0,5556       | 0,2460       | 0,7857        | 0,9048       | 0,4762       | 0,4603       | 0,2778       | 0,5079         | 1,0000           |
| II             | 0,0159       | 0,0079       | 0,2698       | 1,0000       | 0,4603       | 0,0079       | 0,0159       | 0,4206       | 0,4444       | 0,6270        | 0,1032       | 0,0238       | 0,0476       | 0,5317       | 0,6667         | 0,7222           |
| III            | 0,0556       | 0,1349       | 0,8651       | 0,8571       | 0,6825       | 0,1905       | 0,7778       | 0,8571       | 0,2540       | 0,6111        | 0,2540       | 0,0397       | 1,0000       | 0,4048       | 1,0000         | 0,3810           |
| IV             | 0,0079       | 0,0079       | 0,7619       | 0,3095       | 0,1032       | 0,0159       | 0,6032       | 0,1032       | 0,0079       | 0,9048        | 0,4206       | 0,0159       | 0,1190       | 0,0079       | 0,2143         | 0,0079           |
| V              | 0,0556       | 0,8333       | 0,9444       | 1,0000       | 0,1746       | 0,8413       | 0,0079       | 0,7937       | 0,0714       | 0,7381        | 0,0556       | 0,1667       | 0,8095       | 0,1032       | 0,4841         | 0,1587           |
| VI             | 0,5635       | 0,0159       | 0,0873       | 1,0000       | 0,8016       | 0,0079       | 0,0079       | 0,6270       | 0,5873       | 0,7222        | 0,0079       | 0,0238       | 0,0873       | 0,5556       | 0,7222         | 0,0794           |
| VII            | 0,0079       | 0,0079       | 0,0238       | 0,5952       | 0,4683       | 0,0079       | 0,0079       | 0,6429       | 1,0000       | 0,6429        | 0,6825       | 0,0079       | 0,0476       | 0,6270       | 0,9365         | 0,0159           |
| VIII           | 0,0397       | 0,4286       | 0,0873       | 0,0952       | 0,1270       | 0,1270       | 0,0397       | 0,1508       | 0,2937       | 0,0238        | 0,3968       | 0,7698       | 0,9048       | 0,7698       | 0,5952         | 1,0000           |
| IX             | 0,0714       | 0,0556       | 0,5397       | 0,8492       | 1,0000       | 0,5397       | 0,2460       | 0,5397       | 1,0000       | 0,8968        | 0,2460       | 0,0159       | 0,7698       | 0,8810       | 0,7222         | 0,2460           |
| X              | 0,4444       | 0,2698       | 0,3175       | 0,9286       | 0,8968       | 0,6825       | 0,1349       | 0,0556       | 0,9365       | 0,6825        | 0,1984       | 0,0635       | 0,7857       | 1,0000       | 0,7619         | 0,9762           |
| XI             | 0,7143       | 0,7460       | 0,9127       | 0,9206       | 1,0000       | 0,3175       | 0,1508       | 0,6349       | 1,0000       | 1,0000        | 0,5000       | 0,4206       | 0,8810       | 0,9206       | 1,0000         | 0,7698           |
| XII            | 0,6270       | 0,6429       | 0,8889       | 0,8571       | 0,6587       | 0,8333       | 0,2540       | 0,7778       | 0,8810       | 0,7222        | 0,5476       | 0,0635       | 0,4603       | 0,5317       | 1,0000         | 0,2619           |
| XIII           | 0,6111       | 0,3651       | 0,4444       | 0,3810       | 0,4921       | 0,5714       | 0,6111       | 0,4365       | 1,0000       | 0,5635        | 0,7857       | 0,0873       | 0,9365       | 0,3571       | 1,0000         | 0,5000           |

Supplementary Table 5 – Statistics for kinetic family cell abundance. P-values of the permutation tests are given for the indicated comparisons. Red indicate significant differences, p < 0.05.

|              | BD554D           | BT145            | CBL004           | CC840            | CCB116           | ALL               |
|--------------|------------------|------------------|------------------|------------------|------------------|-------------------|
| D-27PP       | 379 216          | 542 145          | 426 000          | 835 039          | 453 826          | 2 636 226         |
| D-19PP       | 572 958          | 514 273          | 649 982          | 516 674          | 240 091          | 2 493 978         |
| H0PP         | 485 631          | 549 104          | 387 036          | 830 053          | 620 959          | 2 872 783         |
| H6PP         | 470 642          | 670 857          | 568 345          | 772 846          | 621 498          | 3 104 188         |
| D1PP         | 632 618          | 653 277          | 469 087          | 838 483          | 752 279          | 3 345 744         |
| D3PP         | 796 397          | 363 416          | 762 792          | 677 265          | 587 500          | 3 187 370         |
| D8PP         | 822 189          | 659 918          | 495 605          | 759 876          | 459 273          | 3 196 861         |
| H0PB         | 860 727          | 778 709          | 642 882          | 657 108          | 545 693          | 3 485 119         |
| H6PB         | 697 280          | 759 853          | 821 341          | 676 713          | 767 993          | 3 723 180         |
| D1PB         | 667 939          | 598 244          | 861 405          | 670 555          | 452 805          | 3 250 948         |
| D3PB         | 447 317          | 736 728          | 96 283           | 674 066          | 718 784          | 2 673 178         |
| D8PB         | 242 058          | 327 046          | 593 431          | 291 948          | 519 604          | 1 974 087         |
| D14PB        | 536 453          | 172 437          | 321 208          | 499 992          | 474 893          | 2 004 983         |
| D28PB        | 564 540          | 396 758          | 554 592          | 1 035 383        | 623 748          | 3 175 021         |
| <b>TOTAL</b> | <b>8 175 965</b> | <b>7 722 765</b> | <b>7 649 989</b> | <b>9 736 001</b> | <b>7 838 946</b> | <b>41 123 666</b> |

**Supplementary Table 6 – Numbers of cells per sample.** The number of events acquired with the CyTOF is indicated for each sample.

| Markers | Number of non-uniform clusters | Percentage of non-uniform clusters |
|---------|--------------------------------|------------------------------------|
| CD32    | 24                             | 3,00                               |
| CD4     | 18                             | 2,25                               |
| CD125   | 14                             | 1,75                               |
| CADM1   | 14                             | 1,75                               |
| CD16    | 12                             | 1,50                               |
| CD123   | 11                             | 1,38                               |
| CD11a   | 10                             | 1,25                               |
| HLA-DR  | 9                              | 1,13                               |
| CD3     | 9                              | 1,13                               |
| FcεRI   | 8                              | 1,00                               |
| CD86    | 8                              | 1,00                               |
| CD11c   | 8                              | 1,00                               |
| CD8     | 7                              | 0,88                               |
| CD14    | 7                              | 0,88                               |
| CD45    | 6                              | 0,75                               |
| CCR5    | 6                              | 0,75                               |
| CD23    | 6                              | 0,75                               |
| CD141   | 6                              | 0,75                               |
| CD11b   | 5                              | 0,63                               |
| CD39    | 5                              | 0,63                               |
| CCR7    | 5                              | 0,63                               |
| CD172a  | 4                              | 0,50                               |
| CD66    | 3                              | 0,38                               |
| CD62L   | 3                              | 0,38                               |
| CD1c    | 3                              | 0,38                               |
| CXCR4   | 3                              | 0,38                               |
| CD64    | 2                              | 0,25                               |
| CD20    | 2                              | 0,25                               |

**Supplementary Table 7 – Uniformity of markers across clusters.** For each marker, the numbers, and percentages of non-uniform clusters are indicated.
